# Supplementary material for: Non-medical Switching from Originator Tumor Necrosis Factor Inhibitors to Their Biosimilars: Systematic Review of Randomized Controlled Trials and Real-World Studies
Source: Springer Nature journal article supplement (doi:10.1007/s12325-018-0742-9), 2018-08-06
Supplement: MOESM1 [file 16012736]

**Supplemental Table 1. FDA- and EMA-Approved Biosimilars for Originator Adalimumab, Etanercept, and Infliximab as of February 14, 2018.**

| Originator (Brand Name)                          | Biosimilar Name | INN and Suffix <sup>a</sup> | Regulatory Authority (Approval Year) | Biosimilar Brand Name | Manufacturer         | Marketing Authorization Holder | Approved Indication Extrapolation |
|--------------------------------------------------|-----------------|-----------------------------|--------------------------------------|-----------------------|----------------------|--------------------------------|-----------------------------------|
| <b>Adalimumab (Humira [1,2])<sup>b</sup></b>     | ABP 501         | Adalimumab                  | EMA (2017)                           | Amgevita [3]          | Amgen                | Amgen                          | Partial <sup>c</sup>              |
|                                                  |                 | Adalimumab                  | EMA (2017)                           | Solymbic [4]          | Amgen                | Amgen                          | Partial <sup>c</sup>              |
|                                                  |                 | Adalimumab-atta             | US FDA (2016)                        | Amjevita [5]          | Amgen                | Amgen                          | Partial <sup>c</sup>              |
|                                                  | SB5             | Adalimumab                  | EMA (2017)                           | Imraldi [6]           | Biogen               | Samsung Bioepis                | Partial <sup>c</sup>              |
|                                                  | BI 695501       | Adalimumab                  | EMA (2017)                           | Cyltezo [7]           | Boehringer Ingelheim | Boehringer Ingelheim           | Partial <sup>c</sup>              |
|                                                  |                 | Adalimumab-adbm             | US FDA (2017)                        | Cyltezo [8]           | Boehringer Ingelheim | Boehringer Ingelheim           | Partial <sup>c</sup>              |
| <b>Etanercept (Enbrel [9,10])<sup>d</sup></b>    | SB4             | Etanercept                  | EMA (2016)                           | Benepali [11]         | Biogen               | Samsung Bioepis                | Full                              |
|                                                  | GP2015          | Etanercept                  | EMA (2017)                           | Erelzi [12]           | Sandoz               | Sandoz                         | Full                              |
|                                                  |                 | Etanercept-szsz             | US FDA (2016)                        | Erelzi [13]           | Sandoz               | Sandoz                         | Partial <sup>e</sup>              |
| <b>Infliximab (Remicade [14,15])<sup>f</sup></b> | CT-P13          | Infliximab                  | EMA (2013)                           | Remsima [16]          | Celltrion            | Celltrion                      | Full                              |
|                                                  |                 | Infliximab                  | EMA (2013)                           | Inflectra [17]        | Celltrion            | Hospira                        | Full                              |
|                                                  |                 | Infliximab-dyyb             | US FDA (2016)                        | Inflectra [18]        | Celltrion            | Pfizer                         | Partial <sup>g</sup>              |
|                                                  | SB2             | Infliximab                  | EMA (2016)                           | Flixabi [19]          | Samsung Bioepis      | Samsung Bioepis                | Full                              |
|                                                  |                 | Infliximab-abda             | US FDA (2017)                        | Renflexis [20]        | Samsung Bioepis      | Merck                          | Partial <sup>g</sup>              |
|                                                  | PF-06438179     | Infliximab-qbtx             | US FDA (2017)                        | Ixifi [21]            | Pfizer               | Pfizer                         | Partial <sup>g</sup>              |

## Non-medical switching systematic review

AS, ankylosing spondylitis; CD, Crohn's disease; EOA, extended oligoarthritis; EMA, European Medicines Agency; ERA, enthesitis-related arthritis; FDA, US Food and Drug Administration; HS, hidradenitis suppurativa; INN, international non-proprietary name; JIA, juvenile idiopathic arthritis; nr-AxSpA, nonradiographic axial spondyloarthritis; PA, polyarthritis; Ps, psoriasis; PsA, psoriatic arthritis; RA, rheumatoid arthritis; UC, ulcerative colitis.

<sup>a</sup>Suffixes are only adopted in the United States (US FDA recommendations for nomenclature).

<sup>b</sup>In the United States, Humira [1] is approved for RA, polyarticular JIA (age  $\geq 2$  y), PsA, AS, CD, pediatric CD (age  $\geq 6$  y), UC, Ps, HS, and UV. In the European Union, Humira [2] is approved for RA, JIA (polyarticular, age  $\geq 2$  y; ERA, age  $\geq 6$  y), AS, nr-axSpA, PsA, Ps, pediatric Ps (age  $\geq 4$  y), HS, adolescent HS (age  $\geq 12$  y), CD, pediatric CD (age  $\geq 6$  y), UC, UV, and pediatric UV (age  $\geq 2$  y).

<sup>c</sup>Amgevita is not approved in the European Union for adolescent HS or pediatric UV; Solymbic is not approved in the European Union for polyarticular JIA, adolescent HS, or pediatric UV. Amjevita and Cytelzo are not approved in the United States for JIA in patients  $< 4$  y, pediatric CD, HS, or UV. Imraldi and Cytelzo are not approved in the European Union for pediatric UV.

<sup>d</sup>In the United States, Enbrel [9] is approved for RA, polyarticular JIA (age  $\geq 2$  y), PsA, AS, Ps, pediatric Ps (age  $\geq 4$  y). In the European Union, Enbrel [10] is approved for RA, JIA (ERA, age  $\geq 2$  y; PsA, PA, and EOA, age  $\geq 12$  y), PsA, AS, nr-axSpA, Ps, pediatric Ps (age  $\geq 6$  y).

<sup>e</sup>Erelzi is not approved for PsA, Ps, or pediatric Ps.

<sup>f</sup>In the United States [14] and the European Union [15], Remicade is approved for RA, PsA, AS, CD, pediatric CD (age  $\geq 6$  y), UC, pediatric UC (age  $\geq 6$  y), and Ps.

<sup>g</sup>Inflectra, Renflexis, and Ixifi are not approved in the United States for pediatric UC.

## References

1. HUMIRA (adalimumab). Full Prescribing Information, AbbVie Inc., North Chicago, IL, USA, 2017.
2. HUMIRA (adalimumab). Summary of Product Characteristics, AbbVie Ltd, Maidenhead, UK, 2018.
3. AMGEVITA (adalimumab). Summary of Product Characteristics, Amgen Europe B.V., Breda, The Netherlands, 2018.
4. SOLYMBIC (adalimumab). Summary of Product Characteristics, Amgen Europe B.V., Breda, The Netherlands, 2018.
5. AMJEVITA (adalimumab). Full Prescribing Information, Amgen Inc, Thousand Oaks, CA, USA, 2016.
6. IMRALDI (adalimumab). Summary of Product Characteristics, Samsung Bioepis UK Limited, Brentford, UK, 2018.
7. CYLTEZO (adalimumab). Summary of Product Characteristics, Boehringer Ingelheim International GmbH, Ingelheim am Rhein, Germany, 2018.
8. CYLTEZO (adalimumab). Full Prescribing Information, Boehringer Ingelheim Pharmaceuticals, Inc., Ridgefield, CT, USA, 2017.
9. ENBREL (etanercept). Full Prescribing Information, Amgen Inc., Thousand Oaks, CA, USA, 2017.
10. ENBREL (etanercept). Summary of Product Characteristics, Pfizer Limited, Sandwich, UK, 2018.
11. BENEPALI (etanercept). Summary of Product Characteristics, Samsung Bioepis UK Limited, Brentford, UK, 2018.
12. ERELZI (etanercept). Summary of Product Characteristics, Sandoz GmbH, Kundl, Austria, 2018.
13. ERELZI (etanercept). Full Prescribing Information, Sandoz Inc., Princeton, NJ, USA, 2018.
14. REMICADE (infliximab). Full Prescribing Information, Janssen Biotech, Inc., Horsham, PA, USA, 2017.

## Non-medical switching systematic review

15. REMICADE (infliximab). Summary of Product Characteristics, Janssen Biologics B.V., Leiden, The Netherlands, 2018.
16. REMSIMA (infliximab). Summary of Product Characteristics, Celltrion Healthcare Hungary Kft., Budapest, Hungary, 2018.
17. INFLECTRA (infliximab). Summary of Product Characteristics, Hospira UK Limited, Maidenhead, UK, 2018.
18. INFLECTRA (infliximab). Full Prescribing Information, Hospira, a Pfizer Company, Lake Forest, IL, 2016.
19. FLIXABI (infliximab). Summary of Product Characteristics, Samsung Bioepis UK Limited, Brentford, UK, 2018.
20. RENFLEXIS (infliximab). Full Prescribing Information, Merck Sharp & Dohme Corp., Kenilworth, NJ, USA, 2017.
21. IXIFI (infliximab). Full Prescribing Information, Pfizer Inc., New York, NY, USA, 2017.

**Supplemental Table 2. Search Strategy.**

| Set# | Searched for                                                                                                                                                                                                                                                                                                                                                        |
|------|---------------------------------------------------------------------------------------------------------------------------------------------------------------------------------------------------------------------------------------------------------------------------------------------------------------------------------------------------------------------|
| S1   | Ti,ab(biosimilar OR biogeneric OR “subsequent entry biologic” OR sbe or “follow on biologic” OR “GP 2015” or gp2015 OR “CT P13” or ctp13 OR SB2 OR SB4 OR Remsima OR Flixabi OR Benepali OR Brenzys OR Inflectra)                                                                                                                                                   |
| S2   | ti,ab(humira or adalimumab or remicade or infliximab or Enbrel or etanercept or simponi or golimumab or cimzia or certolizumab)                                                                                                                                                                                                                                     |
| S3   | ti,ab(interchange* OR switch* OR transition* OR substitute* OR exchang[*4] OR replac[*4] or crossover OR alternat* or conversion or convert[*3])                                                                                                                                                                                                                    |
| S4   | MESH.EXACT.EXPLODE("Drug Substitution") OR EMB.EXACT.EXPLODE("drug substitution") OR su("drug substitution")                                                                                                                                                                                                                                                        |
| S5   | ti,ab(nocebo or "non immunogenic*" or nonimmunogenic* or nonmedical or "non medical")                                                                                                                                                                                                                                                                               |
| S6   | ti,ab(humira or adalimumab or remicade or infliximab or Enbrel or etanercept or simponi or golimumab or cimzia or certolizumab)                                                                                                                                                                                                                                     |
| S7   | ti,ab (“tum*r necrosis factor blocker” or “tnf alpha blockade” or “anti tnf agent**”)                                                                                                                                                                                                                                                                               |
| S8   | ti,ab(“tnf alpha antagonist**” or “anti tnf alpha” or “anti tnf” or “tnf alpha inhibitor**” or “tnf alpha antibod**”) and (therapy or therapies or treatment* or therapeutic* or medication* or agent* OR drug*)                                                                                                                                                    |
| S9   | ti,ab(tnf near/3 (antagonist* or inhibitor* or blocker*)) and (therapy or therapies or treatment* or therapeutic* or medication* or agent* OR drug*)                                                                                                                                                                                                                |
| S10  | ti,ab(“tum*r necrosis factor antagonist**” or “tumour necrosis factor antagonist**” or “tumor necrosis factor inhibitor**” or “tumour necrosis factor inhibitor**”) and (therapy or therapies or treatment* or therapeutic* or medication* or agent* OR drug*)                                                                                                      |
| S11  | ti,ab(“anti tnf” or “anti tumor necrosis factor” or “anti tumour necrosis factor”) near/4 (therapy or therapies or treatment* or therapeutic* or medication* or agent* OR drug*)                                                                                                                                                                                    |
| S12  | Ti,ab((biosimilar OR biogeneric OR “subsequent entry biologic” OR sbe or “follow on biologic” OR “GP 2015” or gp2015 OR “CT P13” or ctp13 OR SB2 OR SB4 OR Remsima OR Flixabi OR Benepali OR Brenzys OR Inflectra) n/3 (interchange* OR switch* OR transition* OR substitute* OR exchang[*9] OR replac[*4] or crossover OR alternat* or conversion or convert[*3])) |

Non-medical switching systematic review

|     |                                                                                                                                                                                                                                                                                                                                                                                        |
|-----|----------------------------------------------------------------------------------------------------------------------------------------------------------------------------------------------------------------------------------------------------------------------------------------------------------------------------------------------------------------------------------------|
| S13 | Ti,ab((biosimilar OR biogeneric OR “subsequent entry biologic” OR sbe or “follow on biologic” OR “GP 2015” OR gp2015 or “CT P13” or ctp13 OR SB2 OR SB4 OR Remsima OR Flixabi OR Benepali OR Brenzys OR Inflectra) n/5 (interchange* OR switch* OR substitute* OR crossover OR alternat* OR transition*) n/3 (reference OR innovator* OR originator*))                                 |
| S14 | ti,ab((juvenile OR jia) NEAR/5 (arthritis OR arthropathy OR polyarthritis OR arthritides OR rheumatoid) OR (chauffard OR stiel OR still[*1]) PRE/0 (disease OR syndrome))                                                                                                                                                                                                              |
| S15 | ti,ab((arthritis OR nodul[*4] OR vasculitis) NEAR/5 (rheumatoid OR RA) OR (felty[*1] OR sjogren[*1] OR caplan[*1] OR still[*1] OR beauvais[*1]) NEAR/5 (syndrome OR disease))                                                                                                                                                                                                          |
| S16 | ti,ab((colitis or coloproctitis or proctocolitis) NEAR/3 (ulcerativ[*1] or ulcerosa or mucosal or ulcerous or ulceration) OR "Colitis Gravis" OR "Idiopathic Proctocolitis")                                                                                                                                                                                                           |
| S17 | ti,ab(psoriasis OR "psoriatic patient*" OR "psoriatic condition*")                                                                                                                                                                                                                                                                                                                     |
| S18 | tio,ab("Psoriatic arthritis" OR "alibert bazin disease" OR "arthritis psoriatica" OR "psoriasis arthritis" OR "arthropathic psoriasis" OR "psoriatic arthropath[*3]" OR "psoriatic polyarthritis" OR "psoriasis arthropathica" OR "psoriasis pustulosa arthropathica" OR "arthritis psoriasis" OR "psoriatic rheumatism" OR "psoriatic rheumatoid arthritis" OR "Arthritic Psoriasis") |
| S19 | ti,ab((ankylating OR ankylopoietic OR ankylos* OR ankylotic) N/3 (spondylitis OR spondylarthritis OR spine OR sponsylarthrosis OR spinal OR vertebral)) OR ((bechterew OR bekhtereve) P/1 (disease OR morbus)) OR (“spondylarthritis ankylopoietica” OR “spondylitis ankylopo*etica”)                                                                                                  |
| S20 | tio,ab((Hidradenitis OR Hidradenitides) NEAR/2 (suppurativa OR Suppurative) OR "acne inversa")                                                                                                                                                                                                                                                                                         |
| S21 | ti,ab(crohn OR crohns OR (colitis OR enteritis OR enterocolitis) n/5 (granulomatous OR regional OR regionalis) OR ileitis n/5 (regional OR terminal) OR Ileocolitis or "inflammatory bowel disease" or uveitis)                                                                                                                                                                        |
| S22 | s6 or s7 or s8 or s9 or s10 or s11                                                                                                                                                                                                                                                                                                                                                     |
| S23 | s14 or s15 or s16 or s17 or s18 or s19 or s20 or s21                                                                                                                                                                                                                                                                                                                                   |
| S24 | (s22 or s23) and s12                                                                                                                                                                                                                                                                                                                                                                   |

Non-medical switching systematic review

|     |                                                                                                                                                                                                                                                                                                                                                                                                                                                 |
|-----|-------------------------------------------------------------------------------------------------------------------------------------------------------------------------------------------------------------------------------------------------------------------------------------------------------------------------------------------------------------------------------------------------------------------------------------------------|
| S25 | (s22 or s23) and s5                                                                                                                                                                                                                                                                                                                                                                                                                             |
| S26 | s1 s2 s4                                                                                                                                                                                                                                                                                                                                                                                                                                        |
| S27 | s1 s2 s3                                                                                                                                                                                                                                                                                                                                                                                                                                        |
| S28 | s1 s5                                                                                                                                                                                                                                                                                                                                                                                                                                           |
| S29 | s1 s4                                                                                                                                                                                                                                                                                                                                                                                                                                           |
| S30 | s1 s3 s4                                                                                                                                                                                                                                                                                                                                                                                                                                        |
| S31 | s12 s5                                                                                                                                                                                                                                                                                                                                                                                                                                          |
| S32 | s12 or s13 or s24 or s25 or s26 or s27 or s28 or s29 or s30 or s31                                                                                                                                                                                                                                                                                                                                                                              |
| S33 | Tio,ab,su((clinical OR multicenter[*2] OR multicentre[*2] OR "multi center[*2]" OR "multi centre[*2]" OR controlled OR randomized OR randomised OR masked OR blind[*3] OR "open label[*2]" OR equipoise OR compar[*6] OR crossover OR "cross over") and (trial[*1] OR study OR studies OR volunteer[*1] OR placebo[*1] OR postmarket[*4] OR "post market[*4]" OR "meta analys[*4]" OR "phase I" OR "phase II" OR "phase III" OR "phase IV"))    |
| S34 | tio,ab,su((clinical OR multicenter[*2] OR multicentre[*2] OR "multi center[*2]" OR "multi centre[*2]" OR controlled OR randomized OR randomised OR masked OR blind[*3] OR "open label[*2]" OR equipoise OR compar[*6] OR crossover OR "cross over") NEAR/8 (trial[*1] OR study OR studies OR volunteer[*1] OR placebo[*1] OR postmarket[*4] OR "post market[*4]" OR "meta analys[*4]" OR "phase I" OR "phase II" OR "phase III" OR "phase IV")) |
| S35 | tio,ab,su((Controlled or randomized or clinical or blind or multicenter or "open label*" or masked or compar* or crossover or "cross over" or placebo or "post market" or postmarket or "meta analysis" or "head to head" ) p/2 (study or trial) or phase p/1 (0 or 1 or 2 or 3 or 4 or I or ii or iii or iv))                                                                                                                                  |
| S36 | tio,ab,su("clinical trial[*1]" or (single or double or treble or triple) n/5 blind[*2] or (mask[*2] or placebo[*5] or random[*5] or prospective or clinical or control[*5] or volunteer[*3] or case or major or multicent[*3]) n/5 (stud[*5] or trial[*4]))                                                                                                                                                                                     |
| S37 | tio,ab,su("head to head")                                                                                                                                                                                                                                                                                                                                                                                                                       |

Non-medical switching systematic review

|     |                                                                                                                                                                                                                                                                  |
|-----|------------------------------------------------------------------------------------------------------------------------------------------------------------------------------------------------------------------------------------------------------------------|
| S38 | tio,ab(direct[*2] n/3 (compare or compared or comparing or compares or comparison[*1] or comparative[*2] or comparabl[*2]))                                                                                                                                      |
| S39 | DTYPE("CLINICAL TRIAL*" OR "CONTROLLED CLINICAL TRIAL" OR "MULTICENTER STUDY" OR "RANDOMIZED CONTROLLED TRIAL")                                                                                                                                                  |
| S40 | MESH.EXACT.EXPLODE("CLINICAL TRIALS AS TOPIC") or EMB.EXACT.EXPLODE("clinical study") OR EMB.EXACT.EXPLODE("CLINICAL TRIAL") or EMB.EXACT.EXPLODE("major clinical study") or EMB.EXACT.EXPLODE("CLINICAL TRIAL (TOPIC)") or EMB.EXACT.EXPLODE("CLINICAL TRIAL*") |
| S41 | SU.exact("Clin.trial") OR su("Clinical Trial") OR su("clinical study") OR su("major clinical study")                                                                                                                                                             |
| S42 | s33 or s34 or s35 or s36 or s37 or s38 or s39 or s40 or s41                                                                                                                                                                                                      |
| S43 | s32 s42                                                                                                                                                                                                                                                          |
| S44 | s43 and pd(>2011) and la(English)                                                                                                                                                                                                                                |
| S45 | s44 AND (tio,ab(patient*) OR Mesh.exact("humans") or Emb.exact("human") or Su(human or humans))                                                                                                                                                                  |
